# Supplementary material
Source: Springer Nature journal article supplement (https://www.springermedizin.de/resource/supplementary/12889_2011_3163_MOESM2_ESM.pdf/9488390)
Supplement: MOESM2 [file 9488390]

| <b>Variables</b>                                                        | <b>Collection method</b>                          |
|-------------------------------------------------------------------------|---------------------------------------------------|
| Socio-demographic                                                       | Clinical record                                   |
| Smoker                                                                  | Clinical record                                   |
| Pack-year index= (n <sup>o</sup> cigarettes per day/20) x smoking years | Clinical record                                   |
| Age at starting the smoking habit                                       | Clinical record                                   |
| Symptoms and signs (morning cough, sputum) and others (specify)         | Clinical record                                   |
| Years of diagnosis of the COPD                                          | Clinical record                                   |
| Spirometer device COPD-6 (FEV 1, FEV 6 and FEV1/FEV6)                   | Device result                                     |
| Evaluation of screening test results                                    | Test                                              |
| Personal history and cardiovascular diseases                            | Clinical record                                   |
| Time test                                                               | Timer/Chronometer                                 |
| Last values of Cholesterol (HDL and LDL), PAS, PAD, BMI                 | Laboratory results taken from the clinical record |
